# Supplementary material for: Detecting plumes in mobile air quality monitoring time series with Density-based Spatial Clustering of Applications with Noise
Source: Copernicus journal article supplement (doi:10.5194/amt-2023-50), 2023-03-14
Supplement: Supplementary file 1 [file amt-2023-50-supplement.pdf]

# 1 **Detecting plumes in mobile air quality monitoring time series** 2 **with Density-based Spatial Clustering of Applications with Noise**

3 Blake Actkinson<sup>1</sup>, Robert J. Griffin<sup>1,2\*</sup>

4 <sup>1</sup>Department of Civil and Environmental Engineering, Rice University, Houston, TX 77005, USA

5 <sup>2</sup> School of Engineering, Computing, and Construction Management, Roger Williams University, Bristol, RI 02809,  
6 USA

7 *Correspondence to:* Robert Griffin (rgriffin@rwu.edu)

## 8 **Supplemental Information**

9 Section S1. Temporal rescaling procedure for census tract comparisons.

10 Section S2. Anomaly type detection probability error estimation procedure.

11 Figures S1-S8

12 Tables S1-S8

13

## 14 **S1 Temporal Rescaling Procedure for Census Tract Comparisons**

15 To remove temporal effects from census tract comparisons of anomaly type detection probability, we perform a  
16 rescaling procedure. We transform each census tract's sampling distribution into a uniform distribution, then multiply  
17 each hour of the newly transformed uniform distribution by the fraction of detected anomalies in that hour.

18 Out of 35 census tracts sampled in the Houston area, we restrict our analysis to 19 to ensure that each hour between 8  
19 AM and 4 PM CST had at least 1,000 samples for each individual census tract. The lowest number of samples in any  
20 given hour for a census tract was 1,061, which equates to  $\approx 17$  minutes of sampling. For each census tract, we calculate  
21 the average number of samples per hour, determined by calculating the total number of samples and dividing by 8, the  
22 number of analyzed hours. In addition to calculating the average number of samples, we calculate for each hour in  
23 each census tract the fraction of that hour's measurement that are of a given anomaly type ("CO<sub>2</sub> – Rich", "Transition",  
24 "BC/UFP – Rich"). In the final step, we multiply the hourly fraction of each anomaly type by the average number of  
25 measurements for the census tract and then sum the results. To determine the % probability of detection for a given  
26 anomaly type, we divide these weighted totals by the number of measurements made within the census tract.

27 Figures S2 and S3 display the effects of implementing the rescaling procedure on the calculated probabilities of  
28 anomaly detection for the 19 census tracts. In general, we note that implementing the rescaling procedure results in  
29 mostly modest increases in these probabilities across the board. A notable exception is the North Rice polygon for  
30 CO<sub>2</sub> anomaly detections. Figure S4 displays the (a) total sampling distribution and (b) anomaly sampling distribution  
31 for the North Rice polygon. We note that the 8 AM hour was oversampled relative to other hours sampled and argue

32 that implementing the rescaling procedure decreases the effects of this hour relative to other sampling times in the  
33 census tract.

34

## 35 **S2. Anomaly Detection Type Probability Error Estimation Procedure**

36 We provide error estimates of our calculated anomaly type detection probabilities and present them in Tabs. S3, S4,  
37 and S5. To do this, we implement the bootstrap for each anomaly detection type probability for each census tract to  
38 generate sampling distributions (Efron and Tibshirani, 1994).

39 We create 1000 synthetic distributions for each census tract by sampling with replacement measurements within each  
40 census tract. For each synthetic distribution, we calculate the probability of each anomaly detection type, repeating  
41 the same temporal rescaling procedure described in Sect. S1 1000 times for each census tract to generate 1000  
42 probabilities of each type. From the resultant sampling distributions, we report the lower and upper bounds of the 90%  
43 confidence interval (5<sup>th</sup> to 95<sup>th</sup> percentiles), the mean, and bias. We define bias as the difference between the originally  
44 calculated probability and its mean probability estimate from its corresponding sampling distribution (in effect, taking  
45 the difference between columns in Tab. 2 and mean columns in Tabs. S3, S4, and S5).

46

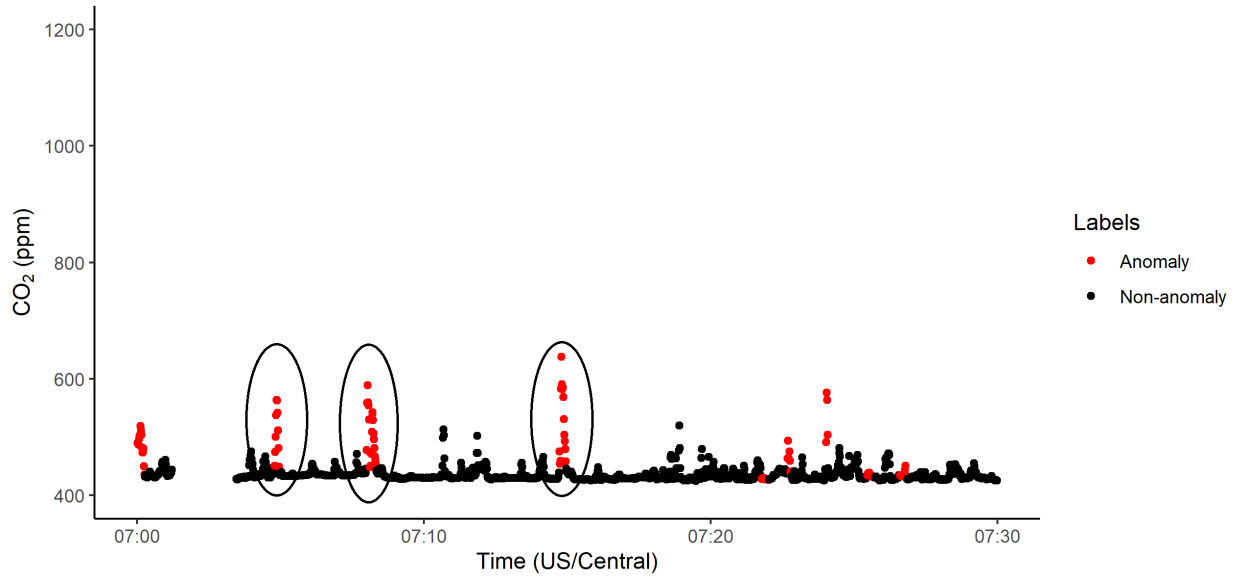

47

48 **Figure S1. Illustration of manually flagged plumes for CO<sub>2</sub>. Points in red are labeled as plume (anomaly), while points in**  
 49 **black are labeled as normal (non-anomaly). Ovals represent manually flagged plumes for this portion of the CO<sub>2</sub> time series.**  
 50 **Note – not all red colored points correspond to CO<sub>2</sub> plumes, but they can represent plume detections in other pollutants not**  
 51 **shown here.**

52

Effects of Scaling on Normalized DBSCAN CO<sub>2</sub> Anomalies

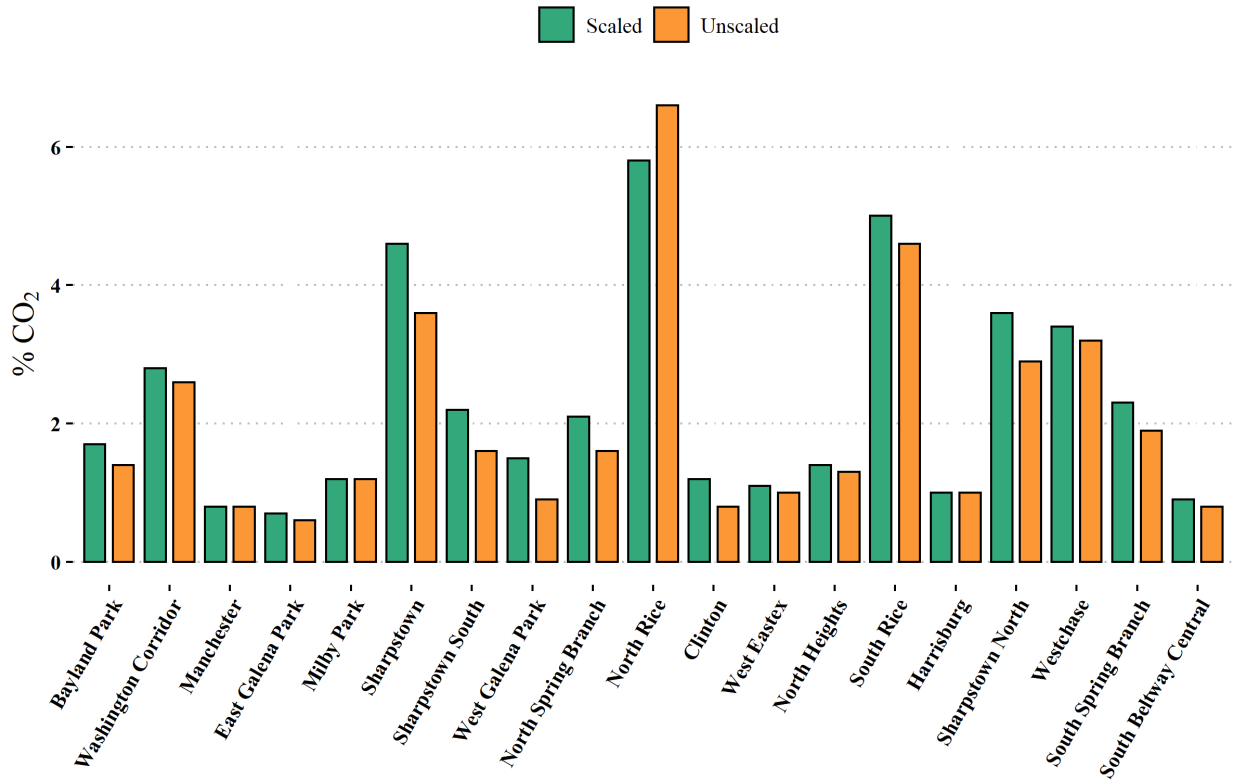

54

55 Figure S2. Effects of scaling on the probability of CO<sub>2</sub> anomaly type detection for each census tract (green/left bar for each  
56 tract is scaled).

57

58

### Effects of Scaling on Normalized DBSCAN BC/UFP Anomalies

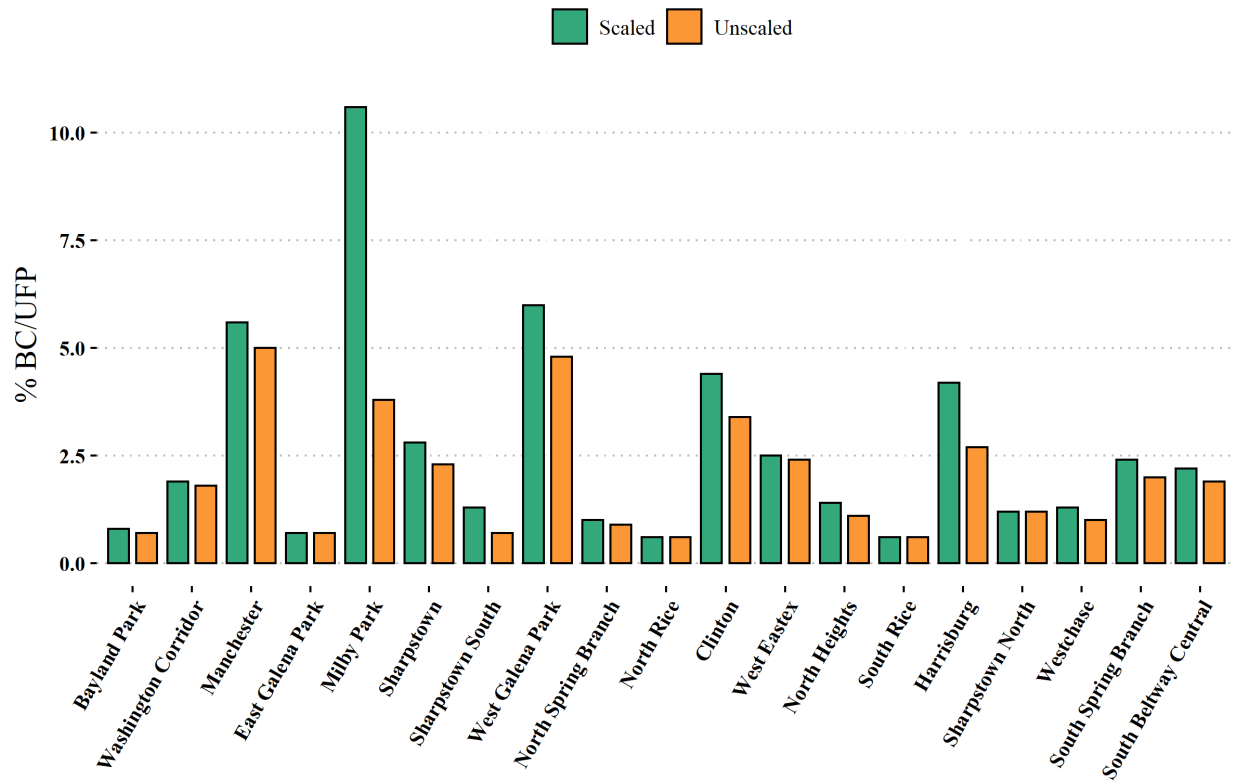

59

60 Figure S3. Effects of rescaling on probability of BC/UFP anomaly type detection for each census tract (green/left bar for  
61 each census tract is scaled).

62

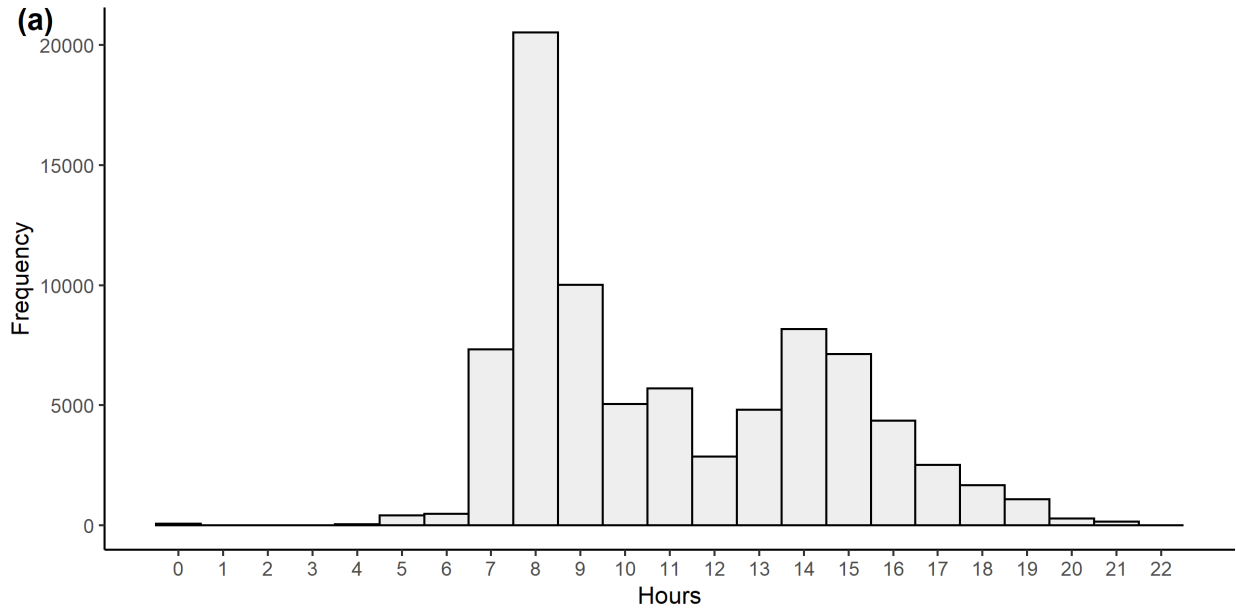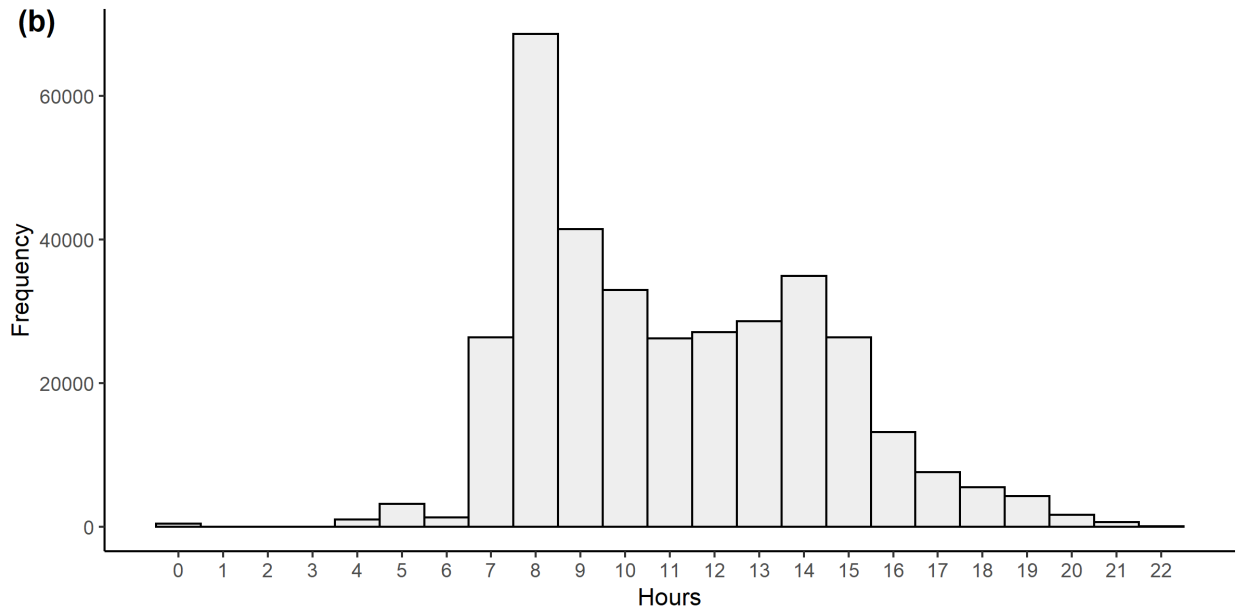

65 **Figure S4. Sampling distributions for (a, top) all measurements and (b, bottom) anomalies in the North Rice census tract.**

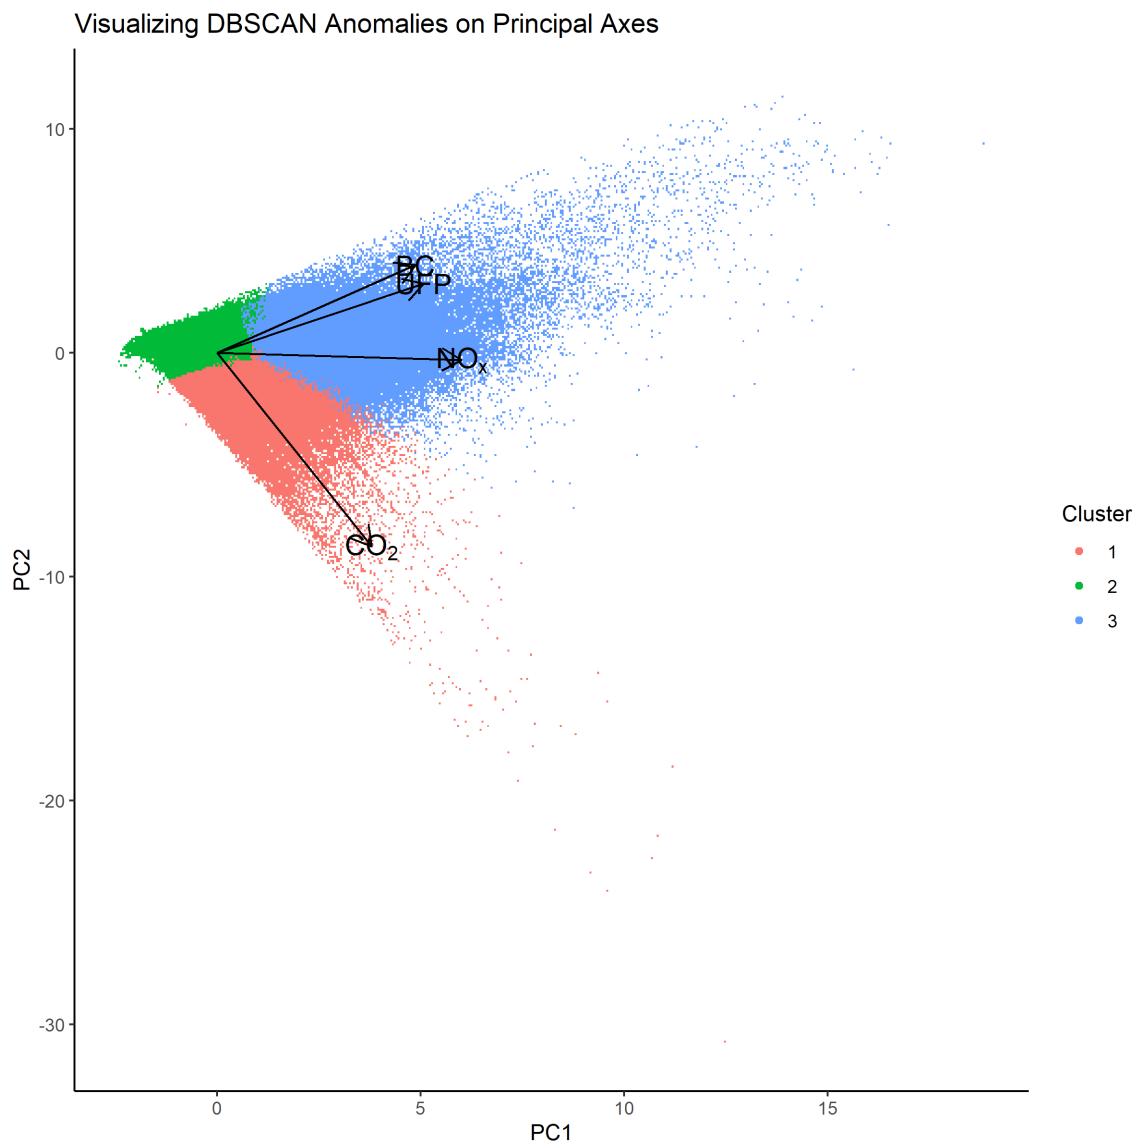

68 Figure S5. Visualizing cluster assignment on the first two principal component axes for DBSCAN-derived anomalies.  
69 Cluster 1 extends down and to the right from the origin, cluster 2 is around the origin, and cluster 3 extends up and to the  
70 right from the origin.

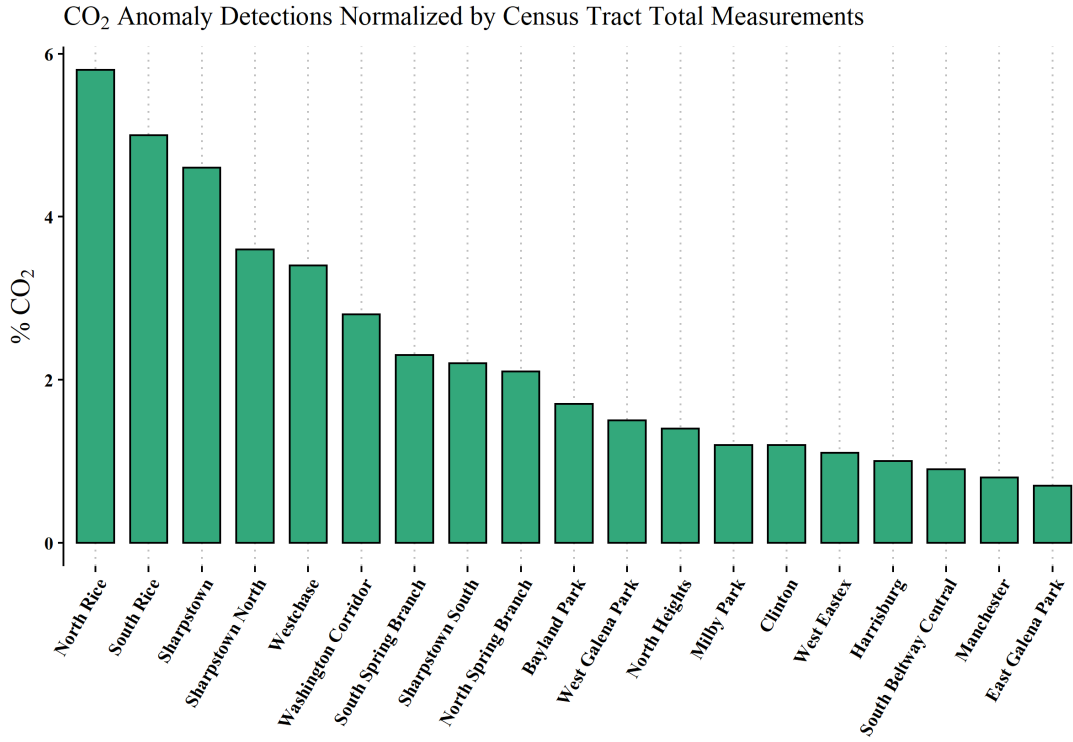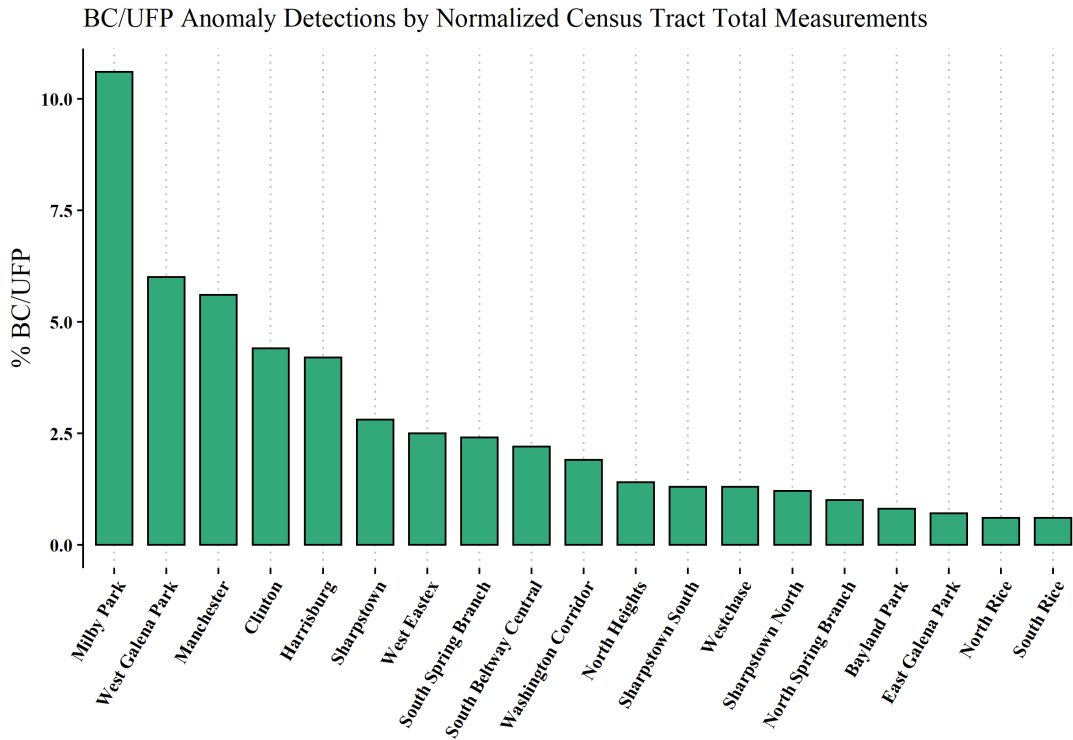

71 Figure S6. Total anomaly type counts per census tract normalized by the total number of measurements within each census  
 72 tract. a) CO<sub>2</sub> (top) b) BC/UFP (bottom).

73

### Effects of Removing Highways on Normalized DBSCAN BC/UEP Anomalies

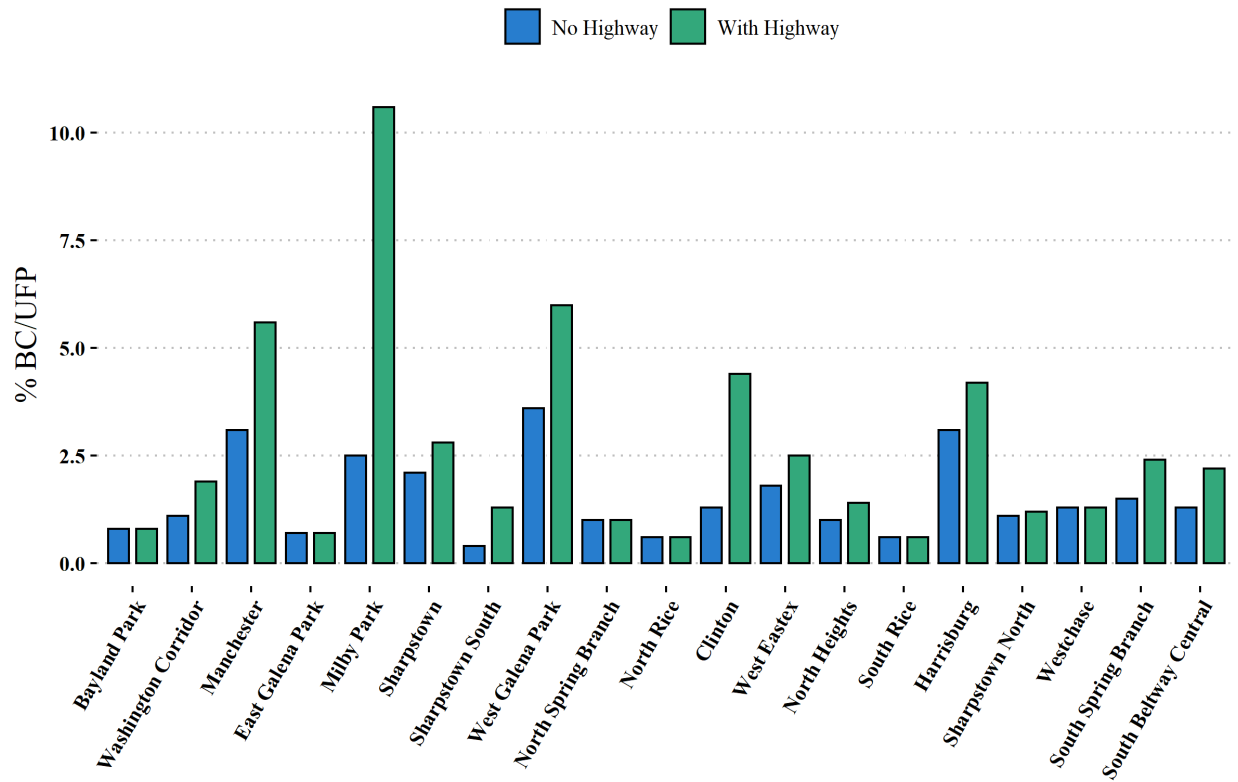

74

75 Figure S7. Probability of detecting BC/UEP anomaly type with highways in the analysis (green, right bar for each census  
 76 tract) and without highways in the analysis (blue, left bar for each census tract).

77

### Effects of Removing Highways on Normalized CO<sub>2</sub> Anomalies

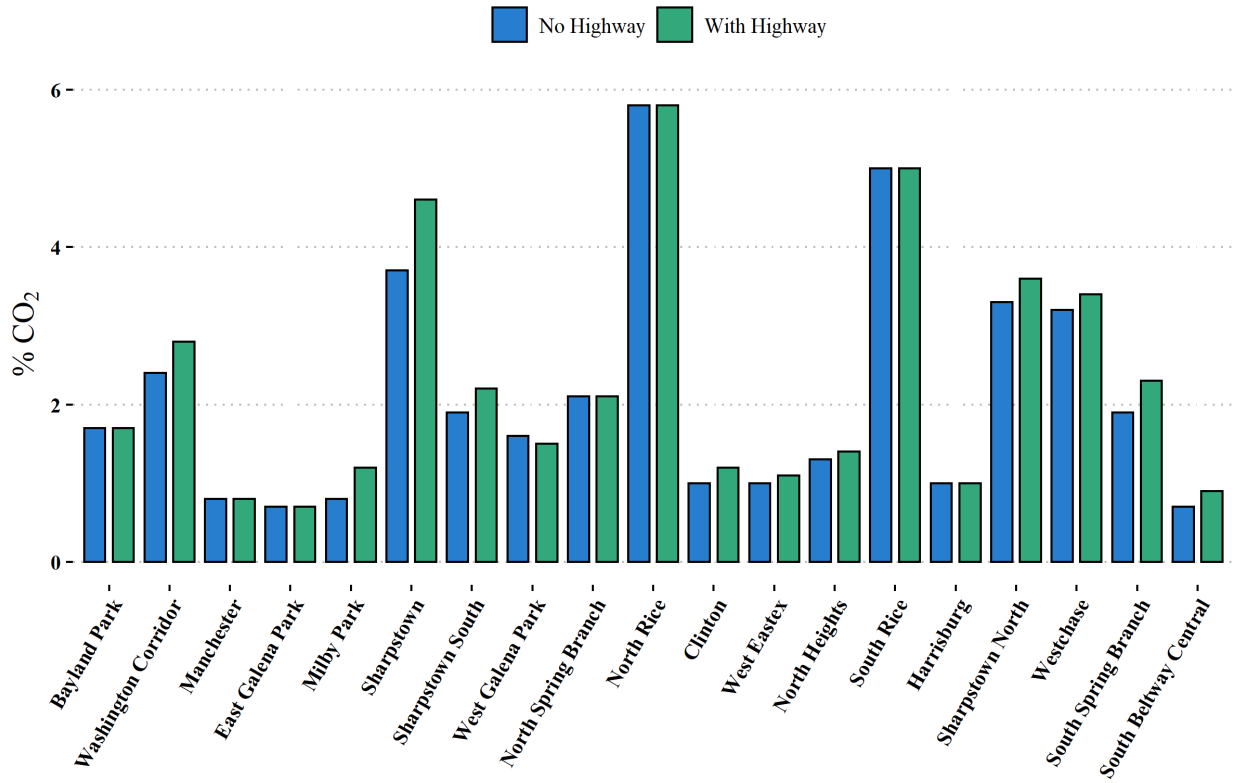

79

80 Figure S8. Probability of detecting CO<sub>2</sub> anomaly type with highways in the analysis (green, right bar for each census tract)  
81 and without highways in the analysis (blue, left bar for each census tract).

82

83 **Table S1. Instruments used in the Houston mobile monitoring campaign.**

| <b>Measured Pollutant</b>                             | <b>Instrument</b>                                                        |
|-------------------------------------------------------|--------------------------------------------------------------------------|
| Black Carbon (BC) (ng m <sup>-3</sup> )               | Magee AE33 (Aethalometer)                                                |
| Carbon Dioxide (CO <sub>2</sub> ) (ppm)               | Li-COR LI-7000 CO <sub>2</sub> /H <sub>2</sub> O Analyzer (Spectroscopy) |
| Nitric Oxide (NO) (ppb)                               | Teledyne T200 (Chemiluminescence)                                        |
| Nitrogen Dioxide (NO <sub>2</sub> ) (ppb)             | Teledyne T500U (CAPS)                                                    |
| Ultrafine Particle Counts (UFP) (p cm <sup>-3</sup> ) | Aerosol Dynamics MAGIC 200p (CPC)                                        |

84

85 **Table S2. Cross validation results for 5 folds.**

| <b>Fold</b> | <b>Trained <math>f_{val}</math></b> | <b>Testing Performance (%)</b> |
|-------------|-------------------------------------|--------------------------------|
| <b>1</b>    | 0.01                                | 85.05                          |
| <b>2</b>    | 0.03                                | 85.93                          |
| <b>3</b>    | 0.03                                | 87.39                          |
| <b>4</b>    | 0.03                                | 84.09                          |
| <b>5</b>    | 0.03                                | 88.57                          |

86

87

88 Table S3. Error estimates for CO<sub>2</sub> anomaly detection type probabilities (in %) by census tract determined from a sampling  
 89 distribution composed of 1000 bootstrap replicates. “Mean” is the mean of the sampling distribution, “Lower” is the 5<sup>th</sup>  
 90 percentile of the sampling distribution, “Upper” is the 95<sup>th</sup> percentile of the sampling distribution, “Bias” is the originally  
 91 calculated value – “Mean”.

| Census Tract          | CO <sub>2</sub> Mean | CO <sub>2</sub> Lower | CO <sub>2</sub> Upper | Bias |
|-----------------------|----------------------|-----------------------|-----------------------|------|
| Bayland Park          | 1.7                  | 1.6                   | 1.8                   | 0    |
| Washington Corridor   | 2.8                  | 2.7                   | 2.9                   | 0    |
| Manchester            | 0.8                  | 0.8                   | 0.9                   | 0    |
| East Galena Park      | 0.7                  | 0.7                   | 0.8                   | 0    |
| Milby Park            | 1.2                  | 1.2                   | 1.3                   | 0    |
| Sharpstown            | 4.6                  | 4.5                   | 4.8                   | 0    |
| Sharpstown South      | 2.2                  | 2.1                   | 2.3                   | 0    |
| West Galena Park      | 1.5                  | 1.4                   | 1.6                   | 0    |
| North Spring Branch   | 2.1                  | 1.9                   | 2.2                   | 0    |
| North Rice            | 5.8                  | 5.7                   | 5.8                   | 0    |
| Clinton               | 1.1                  | 1.1                   | 1.2                   | 0.1  |
| West Eastex           | 1.1                  | 1.0                   | 1.1                   | 0    |
| North Heights         | 1.4                  | 1.4                   | 1.5                   | 0    |
| South Rice            | 5.0                  | 4.9                   | 5.1                   | 0    |
| Harrisburg            | 1.0                  | 1.0                   | 1.1                   | 0    |
| Sharpstown North      | 3.6                  | 3.4                   | 3.7                   | 0    |
| Westchase             | 3.4                  | 3.2                   | 3.5                   | 0    |
| South Spring Branch   | 2.3                  | 2.2                   | 2.4                   | 0    |
| South Beltway Central | 0.9                  | 0.9                   | 0.9                   | 0    |

92

93

94 Table S4. Error estimates for BC/UFP anomaly detection type probabilities (in %) by census tract determined from a  
 95 sampling distribution composed of 1000 bootstrap replicates. “Mean” is the mean of the sampling distribution, “Lower” is  
 96 the 5<sup>th</sup> percentile of the sampling distribution, “Upper” is the 95<sup>th</sup> percentile of the sampling distribution, “Bias” is the  
 97 originally calculated value – “Mean”.

| Census Tract          | BC/UFP Mean | BC/UFP Lower | BC/UFP Upper | Bias |
|-----------------------|-------------|--------------|--------------|------|
| Bayland Park          | 0.8         | 0.8          | 0.9          | 0    |
| Washington Corridor   | 1.9         | 1.8          | 2.0          | 0    |
| Manchester            | 5.6         | 5.5          | 5.8          | 0    |
| East Galena Park      | 0.7         | 0.6          | 0.7          | 0    |
| Milby Park            | 10.6        | 10.3         | 11.0         | 0    |
| Sharpstown            | 2.8         | 2.6          | 2.9          | 0    |
| Sharpstown South      | 1.3         | 1.2          | 1.4          | 0    |
| West Galena Park      | 6.0         | 5.8          | 6.1          | 0    |
| North Spring Branch   | 1.0         | 0.9          | 1.0          | 0    |
| North Rice            | 0.6         | 0.5          | 0.6          | 0    |
| Clinton               | 4.4         | 4.3          | 4.5          | 0    |
| West Eastex           | 2.6         | 2.5          | 2.6          | -0.1 |
| North Heights         | 1.4         | 1.4          | 1.5          | 0    |
| South Rice            | 0.6         | 0.6          | 0.7          | 0    |
| Harrisburg            | 4.2         | 4.0          | 4.3          | 0    |
| Sharpstown North      | 1.2         | 1.1          | 1.2          | 0    |
| Westchase             | 1.3         | 1.2          | 1.4          | 0    |
| South Spring Branch   | 2.4         | 2.3          | 2.5          | 0    |
| South Beltway Central | 2.2         | 2.1          | 2.2          | 0    |

98

99

100 Table S5. Error estimates for Transition anomaly detection type probabilities (in %) by census tract determined from a  
 101 sampling distribution composed of 1000 bootstrap replicates. “Mean” is the mean of the sampling distribution, “Lower” is  
 102 the 5<sup>th</sup> percentile of the sampling distribution, “Upper” is the 95<sup>th</sup> percentile of the sampling distribution, “Bias” is the  
 103 originally calculated value – “Mean”.

| Census Tract          | Transition Mean | Transition Lower | Transition Upper | Bias |
|-----------------------|-----------------|------------------|------------------|------|
| Bayland Park          | 8.6             | 8.4              | 8.7              | 0    |
| Washington Corridor   | 13.3            | 13.2             | 13.4             | 0    |
| Manchester            | 19.6            | 19.4             | 19.8             | 0    |
| East Galena Park      | 8.6             | 8.5              | 8.8              | 0    |
| Milby Park            | 16.7            | 16.4             | 17.1             | 0.1  |
| Sharpstown            | 17.8            | 17.6             | 18.1             | 0    |
| Sharpstown South      | 9.5             | 9.3              | 9.7              | 0    |
| West Galena Park      | 16.5            | 16.3             | 16.7             | 0    |
| North Spring Branch   | 12.0            | 11.7             | 12.2             | 0    |
| North Rice            | 14.4            | 14.3             | 14.5             | 0    |
| Clinton               | 20.1            | 19.9             | 20.3             | 0    |
| West Eastex           | 12.7            | 12.6             | 12.9             | 0.1  |
| North Heights         | 10.4            | 10.3             | 10.5             | 0    |
| South Rice            | 13.4            | 13.2             | 13.5             | 0    |
| Harrisburg            | 16.9            | 16.7             | 17.1             | 0    |
| Sharpstown North      | 18.7            | 18.4             | 19.0             | 0    |
| Westchase             | 12.7            | 12.5             | 13.0             | 0    |
| South Spring Branch   | 13.3            | 13.1             | 13.6             | 0    |
| South Beltway Central | 16.3            | 16.2             | 16.4             | 0    |

104

105

106 **Table S6. Counts of when QOR or DBSCAN outperform the other under different circumstances.**

| <b>QOR Label</b> | <b>DBSCAN Label</b> | <b>Correct Label</b> | <b>Counts</b> |
|------------------|---------------------|----------------------|---------------|
| “Anomaly”        | “Normal”            | “Normal”             | 19456         |
| “Normal”         | “Anomaly”           | “Normal”             | 6739          |
| “Normal”         | “Anomaly”           | “Anomaly”            | 8183          |
| “Anomaly”        | “Normal”            | “Anomaly”            | 12174         |

107

108 **Table S7. Loadings post varimax rotation from Fig. S5. Varimax rotated loadings from Larson et al. (2017) are also**  
 109 **presented for reference.**

|                       | <b>CO<sub>2</sub>-rich<br/>(This work)</b> | <b>CO-rich<br/>(Larson)</b> | <b>BC-rich<br/>(This work)</b> | <b>BC-rich<br/>(Larson)</b> |
|-----------------------|--------------------------------------------|-----------------------------|--------------------------------|-----------------------------|
| <b>BC</b>             | -0.02                                      | 0.09                        | 0.76                           | 0.88                        |
| <b>CO<sub>2</sub></b> | 0.97                                       | 0.76                        | 0.07                           | 0.19                        |
| <b>NO<sub>x</sub></b> | 0.42                                       | 0.69                        | 0.70                           | 0.62                        |
| <b>UFP</b>            | 0.08                                       | 0.26                        | 0.75                           | 0.87                        |

110

111

112  
113

Table S8. Census tract characteristics reprinted from Actkinson et al. (2021). Data taken from U.S. Census (2010) and Environmental Defense Fund (2020).

| Census Tract          | Population Total | # Metal Recyclers | # Concrete Batch Plants | # Petrochemical Facilities | Area (sq. miles) | # Facilities (sq. mi) <sup>-1</sup> |
|-----------------------|------------------|-------------------|-------------------------|----------------------------|------------------|-------------------------------------|
| North Spring Branch   | 5126             | 0                 | 0                       | 0                          | 0.57             | 0                                   |
| South Spring Branch   | 3604             | 0                 | 0                       | 0                          | 0.73             | 0                                   |
| Washington Corridor   | 5432             | 2                 | 0                       | 0                          | 1.39             | 1.44                                |
| West Eastex           | 2753             | 5                 | 2                       | 0                          | 1.42             | 4.93                                |
| North Heights         | 6472             | 1                 | 0                       | 0                          | 1.18             | 0.85                                |
| Westchase             | 5548             | 0                 | 0                       | 0                          | 0.70             | 0                                   |
| Sharpstown            | 5616             | 0                 | 0                       | 0                          | 0.50             | 0                                   |
| Sharpstown North      | 3484             | 0                 | 1                       | 0                          | 0.56             | 1.79                                |
| Sharpstown South      | 5196             | 0                 | 0                       | 0                          | 0.94             | 0                                   |
| Bayland Park          | 5083             | 0                 | 0                       | 0                          | 0.71             | 0                                   |
| South Beltway Central | 2530             | 3                 | 8                       | 0                          | 12.28            | 0.90                                |
| North Rice            | 2892             | 0                 | 0                       | 0                          | 0.58             | 0                                   |
| South Rice            | 5355             | 0                 | 0                       | 0                          | 0.93             | 0                                   |
| Clinton               | 2127             | 2                 | 1                       | 1                          | 1.50             | 2.67                                |
| West Galena Park      | 5245             | 0                 | 0                       | 0                          | 2.90             | 0                                   |
| East Galena Park      | 3000             | 0                 | 0                       | 0                          | 0.97             | 0                                   |
| Manchester            | 1647             | 0                 | 0                       | 1                          | 2.80             | 0.36                                |
| Harrisburg            | 1496             | 2                 | 0                       | 2                          | 1.01             | 3.96                                |
| Milby Park            | 6662             | 0                 | 0                       | 0                          | 1.61             | 0                                   |

114

115

116 **References**

- 117 Actkinson, B., Ensor, K., and Griffin, R. J. SIBaR: A new method for background quantification  
118 and removal from mobile air pollution measurements, *Atmos. Meas. Tech.*, 14 (8), 5809–5821,  
119 doi.org/10.5194/amt-14-5809-2021, 2021.
- 120 Efron, B. and Tibshirani, R. J. *An Introduction to the Bootstrap*; Chapman and Hall/CRC: New  
121 York, doi.org/10.1201/9780429246593, 1994.
- 122 Environmental Defense Fund, Finding pollution—and who it impacts most—in Houston,  
123 <https://www.edf.org/maps/airqualitymaps/houston/pollution-map/> (accessed 2020 -11 -23).
- 124 Larson, T., Gould, T., Riley, E. A., Austin, E., Fintzi, J., Sheppard, L., Yost, M., and Simpson, C.,  
125 Ambient air quality measurements from a continuously moving mobile platform: Estimation of  
126 area-wide, fuel-based, mobile source emission factors using absolute principal component scores,  
127 *Atmos. Environ.*, 152, 201–211, doi.org/10.1016/j.atmosenv.2016.12.037, 2017.
- 128 U.S. Census, Census 2010 Tracts, [https://cohgis-mycity.opendata.arcgis.com/datasets/census-](https://cohgis-mycity.opendata.arcgis.com/datasets/census-2010-tracts)  
129 [2010-tracts](https://cohgis-mycity.opendata.arcgis.com/datasets/census-2010-tracts) (accessed 2020 -11 -23).
